# Supplementary material
Source: HighWire-hosted journal article supplement (doi:10.1101/rna.079688.123)
Supplement: Supplemental_File.xlsx [file Supplemental_File.xlsx]

## Sheet: Sheet1
			% RT			StDEV			StDEV*StDEV
			eV	tRNA		eV	tRNA		eV	tRNA		Student T test
	Fig. 1A	Cys01	3.32811	5.67511		0.207483	0.0592766		0.0430492	0.00351372		10.8766
		Cys02	3.32811	4.51964		0.207483	0.0544059		0.0430492	0.00296001		5.55502
	Fig. 1B	Cys03	3.33986	4.24935		0.16531	0.186368		0.0273275	0.0347331		3.65081
		Cys04	3.33986	4.29905		0.16531	0.116653		0.0273275	0.013608		4.74084
		Cys05	2.94058	3.7241		0.105143	0.107203		0.011055	0.0114925		5.21796
	Fig. 1C	Cys06	3.3055	3.89776		0.295858	0.0955016		0.087532	0.00912055		1.90505
		Cys07	3.3055	3.26778		0.295858	0.309974		0.087532	0.0960839		-0.0880227
		Cys08	3.33986	3.38484		0.16531	0.0643076		0.0273275	0.00413547		0.253605
		Cys09	3.3055	3.33322		0.295858	0.0843545		0.087532	0.00711567		0.0901069
			RT	StDev								t test
	Fig. 2	eV	4.27439	0.144459						0.0208685		0
		Cys01	5.97319	0.0561447						0.00315223		10.961
		Cys02	4.76984	0.375098						0.140698		1.23259
		Cys03	5.28929	0.211673						0.0448055		3.96027
		Cys06	4.82856	0.00509132						2.59215e-05		3.83375
		Cys08	3.81955	0.300871						0.0905233		-1.36281
			F/R	st DEV
	Sup Fig. 2	eV	18.88	0.622427
		Cys01	18.5861	0.4804
		Cys02	18.1252	0.0245455
		Cys03	18.3804	0.0159242
		Cys04	18.6827	0.473396
		Cys05	17.6232	0.802466
		Cys06	19.9213	3.30299
		Cys07	19.0084	0.211057
		Cys08	20.2777	2.79812
		Cys09	18.8628	0.897922
