# Supplementary material
Source: HighWire-hosted journal article supplement (doi:10.1101/rna.079688.123)
Supplement: Supplemental_Information.docx [file Supplemental_Information.docx]

**Supplemental Information**

**Cysteine tRNA acts as a stop codon readthrough-inducing**

**rti-tRNA in the human HEK293T cell line.**

Leoš Shivaya Valášek1*, Michaela Kučerová1, Jakub Zeman1,2, and Petra Beznosková1*

1Laboratory of Regulation of Gene Expression, Institute of Microbiology ASCR,

Videnska 1083, 142 20, Prague, the Czech Republic

2Present address: Center for Molecular Medicine Cologne (CMMC), Faculty of Medicine, University of Cologne, Cologne 50931, Germany.

*To whom correspondence should be addressed. [valasekl@biomed.cas.cz](mailto:valasekl@biomed.cas.cz)

[p.beznoskova@seznam.cz](mailto:p.beznoskova@seznam.cz)

Tel: +420 241 062 288

Running title: human cysteine tRNA promotes readthrough

Keywords**:** cysteine tRNA, near-cognate tRNA, readthrough-inducing tRNA, translation, stop codon readthrough

**Supplementary materials and methods**

**Construction of plasmids**

List of all plasmids, PCR primers and Genestrings used throughout this study can be found in Supplementary Tables 7 – 9, respectively.

PBB200 was created by inserting the *Apa*I/*Kpn*I fragment from annealed primers PB179 and PB180 into *Apa*I/*Kpn*I digested PBB172.

PBB210 was created by inserting the *Sal*I-*Not*I digested fragment from PBB171 into *Sal*I-*Not*I digested PBB200.

PBB201 was created by inserting the *Apa*I/*Kpn*I fragment from annealed primers PB181 and PB182 into *Apa*I/*Kpn*I digested PBB172.

PBB212 was created by inserting the *Sal*I-*Not*I digested fragment from PBB171 into *Sal*I-*Not*I digested PBB201.

PBB202 was created by inserting the *Apa*I/*Kpn*I fragment from annealed primers PB183 and PB184 into *Apa*I/*Kpn*I digested PBB172.

PBB215 was created by inserting the *Sal*I-*Not*I digested fragment from PBB171 into *Sal*I-*Not*I digested PBB202.

PBB267 was created by inserting *Msc*I/*Kpn*I digested fragment from Genestring SG5 into *Msc*I/*Kpn*I digested PBB171.

PBB268 was created by inserting *Msc*I/*Kpn*I digested fragment from Genestring SG5 into *Msc*I/*Kpn*I digested PBB172.

pMK1 was created by inserting *Sal*I/*Bam*HI digested fragment from Genestring MK1 into *Sal*I/*Bam*HI digested GL3101.

pMK9 was created by inserting *Sal*I/*Bam*HI digested fragment from Genestring MK1 into *Sal*I/*Bam*HI digested GL3102.

pMK3 was created by inserting *Sal*I/*Bam*HI digested fragment from Genestring MK2 into *Sal*I/*Bam*HI digested GL3101.

pMK11 was created by inserting *Sal*I/*Bam*HI digested fragment from Genestring MK2 into *Sal*I/*Bam*HI digested GL3102.

pMK4 was created by inserting *Sal*I/*Bam*HI digested fragment from Genestring MK3 into *Sal*I/*Bam*HI digested GL3101.

pMK13 was created by inserting *Sal*I/*Bam*HI digested fragment from Genestring MK3 into *Sal*I/*Bam*HI digested GL3102.

pMK5 was created by inserting *Sal*I/*Bam*HI digested fragment from Genestring MK4 into *Sal*I/*Bam*HI digested GL3101.

pMK15 was created by inserting *Sal*I/*Bam*HI digested fragment from Genestring MK4 into *Sal*I/*Bam*HI digested GL3102.

pMK7 was created by inserting *Sal*I/*Bam*HI digested fragment from Genestring MK5 into *Sal*I/*Bam*HI digested GL3101.

pMK17 was created by inserting *Sal*I/*Bam*HI digested fragment from Genestring MK5 into *Sal*I/*Bam*HI digested GL3102.

pMK20 was created by inserting *Msc*I/*Kpn*I digested fragment from pMK1 into *Msc*I/*Kpn*I digested PBB171.

pMK19 was created by inserting *Msc*I/*Kpn*I digested fragment from pMK1 into *Msc*I/*Kpn*I digested PBB172.

pMK24 was created by inserting *Msc*I/*Kpn*I digested fragment from pMK3 into *Msc*I/*Kpn*I digested PBB171.

pMK22 was created by inserting *Msc*I/*Kpn*I digested fragment from pMK3 into *Msc*I/*Kpn*I digested PBB172.

pMK28 was created by inserting *Msc*I/*Kpn*I digested fragment from pMK13 into *Msc*I/*Kpn*I digested PBB171.

pMK26 was created by inserting *Msc*I/*Kpn*I digested fragment from pMK13 into *Msc*I/*Kpn*I digested PBB172.

pMK32 was created by inserting *Msc*I/*Kpn*I digested fragment from pMK5 into *Msc*I/*Kpn*I digested PBB171.

pMK30 was created by inserting *Msc*I/*Kpn*I digested fragment from pMK5 into *Msc*I/*Kpn*I digested PBB172.

pMK36 was created by inserting *Msc*I/*Kpn*I digested fragment from pMK7 into *Msc*I/*Kpn*I digested PBB171.

pMK34 was created by inserting *Msc*I/*Kpn*I digested fragment from pMK7 into *Msc*I/*Kpn*I digested PBB172.

**Supplementary REFERENCES**

Beznoskova P, Bidou L, Namy O, Valasek LS. 2021. Increased expression of tryptophan and tyrosine tRNAs elevates stop codon readthrough of reporter systems in human cell lines. *Nucleic Acids Res* **49**: 5202-5215.

Loughran G, Howard MT, Firth AE, Atkins JF. 2017. Avoidance of reporter assay distortions from fused dual reporters. *RNA* **23**: 1285-1289.

Rudolph KL, Schmitt BM, Villar D, White RJ, Marioni JC, Kutter C, Odom DT. 2016. Codon-Driven Translational Efficiency Is Stable across Diverse Mammalian Cell States. *PLoS Genet* **12**: e1006024.

Shigematsu M, Honda S, Loher P, Telonis AG, Rigoutsos I, Kirino Y. 2017. YAMAT-seq: an efficient method for high-throughput sequencing of mature transfer RNAs. *Nucleic Acids Res* **45**: e70.

Torres AG, Reina O, Stephan-Otto Attolini C, Ribas de Pouplana L. 2019. Differential expression of human tRNA genes drives the abundance of tRNA-derived fragments. *Proc Natl Acad Sci U S A* **116**: 8451-8456.

**Supplementary tables**

**Supplementary Table 1.** List of all tRNA-Cys-GCA isodecoders with their Mature tRNA score and the p2luci UGA readthrough values compared to the reporter with no tRNA (empty vector, eV). The changes in the readthrough levels relative to the reporter with no tRNA (eV) were analysed by Student’s t-test (mean+SD; n=2); statistically significant increases (P < 0.01) are marked with asterisk (*).

| **tRNA** | **Mature tRNA score** | **Empty vector readthrough mean in % (p2luci)** | **SD (eV)** | **Tested tRNA readthrough mean in % (p2luci)** | **SD (tested tRNA)** | **Student's t-test** |
| --- | --- | --- | --- | --- | --- | --- |
| Cys01 | 81.8 | 3.33 | 0.21 | 5.68 | 0.06 | 26.52* |
| Cys02 | 81.9 | 3.33 | 0.21 | 4.52 | 0.05 | 6.11* |
| Cys03 | 77.2 | 3.34 | 0.17 | 4.25 | 0.19 | 3.68* |
| Cys04 | 77.3 | 3.34 | 0.17 | 4.30 | 0.12 | 3.79* |
| Cys05 | 78.7 | 2.94 | 0.11 | 3.72 | 0.11 | 2.82* |
| Cys06 | 71.6 | 3.31 | 0.30 | 3.90 | 0.10 | 1.36 |
| Cys07 | 64.9 | 3.31 | 0.30 | 3.27 | 0.31 | 0.09 |
| Cys08 | 70.7 | 3.34 | 0.17 | 3.38 | 0.06 | 1.17 |
| Cys09 | 46.2 | 3.31 | 0.30 | 3.33 | 0.08 | 0.09 |

**Supplementary Table 2.** All tRNA-Cys-GCA isodecoders detected by tRNA-Seq in HEK293T by (Torres et al. 2019). The expression values are expressed as RPM (reads per million). Both columns show results for HEK293T cell line, named CTRL (3.1) and CTRL (4.1). The levels of expression are demonstrated using a plus sign “+”, + meaning 0-20 %; ++ meaning 20-40 %; +++ meaning 40-60 %; ++++ meaning 60-80 %; +++++ meaning 80-100 % of expression (100 % being the highest scoring value). Altogether 23 tRNA-Cys-GCA isodecoders were described so far for the GCA isoacceptor and single molecule for the ACA isoacceptor. The table shows 33 tRNA-Cys molecules, including tRNA-Cys-ACA-1-1, which is categorized as primary pseudogene by tRNAscan SE 2.0, tRNA-Cys-GCA-24-1, which is categorized as a molecule with uncertain function, and tRNA-Cys-GCA-25-1, which is categorized as primary pseudogene.

|  |  | **tRNA-Seq results in HEK293T cell line** | |  | **Expression analysis** | |
| --- | --- | --- | --- | --- | --- | --- |
| **tRNA** | **Gene name** | **CTRL(3.1)** | **CTRL(4.1)** |  | **CTRL(3.1)** | **CTRL(4.1)** |
|  | tRNA-Cys-GCA-1-1 | 128.91 | 626.21 |  | ++ | +++ |
| Cys02 | tRNA-Cys-GCA-2-1 | 432.58 | 343.95 |  | +++++ | + |
| tRNA-Cys-GCA-2-2 | 512.79 | 1343.08 |  | +++++ | +++++ |
| tRNA-Cys-GCA-2-3 | 101.70 | 134.59 |  | + | + |
| tRNA-Cys-GCA-2-4 | 210.56 | 525.27 |  | +++ | ++ |
|  | tRNA-Cys-GCA-3-1 | 12.89 | 72.90 |  | + | + |
| Cys01 | tRNA-Cys-GCA-4-1 | 75.92 | 200.01 |  | + | + |
| Cys05 | tRNA-Cys-GCA-5-1 | 174.75 | 391.61 |  | ++ | + |
|  | tRNA-Cys-GCA-6-1 | 121.75 | 312.17 |  | ++ | + |
|  | tRNA-Cys-GCA-7-1 | 48.70 | 65.42 |  | + | + |
| Cys04 | tRNA-Cys-GCA-8-1 | 35.81 | 262.63 |  | + | + |
| Cys03 | tRNA-Cys-GCA-9-1 | 35.81 | 105.61 |  | + | + |
| tRNA-Cys-GCA-9-2 | 98.83 | 568.26 |  | + | +++ |
| tRNA-Cys-GCA-9-3 | 111.72 | 660.79 |  | ++ | +++ |
| tRNA-Cys-GCA-9-4 | 95.97 | 565.46 |  | + | +++ |
|  | tRNA-Cys-GCA-10-1 | 17.19 | 66.36 |  | + | + |
|  | tRNA-Cys-GCA-11-1 | 1.43 | 17.76 |  | + | + |
|  | tRNA-Cys-GCA-12-1 | 157.56 | 1032.78 |  | ++ | ++++ |
|  | tRNA-Cys-GCA-13-1 | 14.32 | 25.24 |  | + | + |
| Cys06 | tRNA-Cys-GCA-14-1 | 53.00 | 290.67 |  | + | + |
|  | tRNA-Cys-GCA-15-1 | 35.81 | 46.73 |  | + | + |
|  | tRNA-Cys-GCA-16-1 | 35.81 | 31.78 |  | + | + |
| Cys08 | tRNA-Cys-GCA-17-1 | 423.98 | 1283.26 |  | +++++ | +++++ |
|  | tRNA-Cys-GCA-18-1 | 61.59 | 106.55 |  | + | + |
|  | tRNA-Cys-GCA-19-1 | 10.03 | 79.44 |  | + | + |
|  | tRNA-Cys-GCA-20-1 | 17.19 | 43.93 |  | + | + |
|  | tRNA-Cys-GCA-21-1 | 144.67 | 521.53 |  | ++ | ++ |
| Cys07 | tRNA-Cys-GCA-22-1 | 38.67 | 40.19 |  | + | + |
|  | tRNA-Cys-GCA-23-1 | 75.92 | 88.79 |  | + | + |
|  | tRNA-Cys-GCA-24-1 | 7.16 | 26.17 |  | + | + |
|  | tRNA-Cys-GCA-25-1 | 14.32 | 143.93 |  | + | + |
| Cys09 | tRNA-Cys-ACA-1-1 | 8.59 | 10.28 |  | + | + |

**Supplementary Table 3.** The tRNA-Cys-GCA isodecoders detected by ChIP-Seq in HepG2, Huh7 and healthy liver adult cell lines by (Rudolph et al. 2016).The expression values are expressed as RPM (reads per million). The levels of expression are demonstrated using a plus sign “+”, + meaning 0-20 %; ++ meaning 20-40 %; +++ meaning 40-60 %; ++++ meaning 60-80 %;
+++++ meaning 80-100 % of expression (100 % being the highest scoring value).

|  |  | **ChiP-Seq levels in cell lines** | | |  | **Expression analysis** | | |
| --- | --- | --- | --- | --- | --- | --- | --- | --- |
| **tRNA** | **Gene name** | **HepG2** | **Huh7** | **Liver-Adult** |  | **HepG2** | **Huh7** | **Liver-Adult** |
|  | tRNA-Cys-GCA-1-1 | 147.40 | 249.46 | 66.77 |  | + | + | + |
| Cys02 | tRNA-Cys-GCA-2-2 | 2239.61 | 2906.76 | 2505.33 |  | ++ | +++ | ++ |
| tRNA-Cys-GCA-2-3 | 5732.34 | 4918.50 | 10120.96 |  | +++++ | +++++ | +++++ |
| Cys01 | tRNA-Cys-GCA-4-1 | 4202.66 | 3990.54 | 6029.02 |  | ++++ | +++++ | ++++ |
| Cys05 | tRNA-Cys-GCA-5-1 | 374.60 | 571.56 | 101.81 |  | + | + | + |
| Cys04 | tRNA-Cys-GCA-8-1 | 236.95 | 105.00 | 90.39 |  | + | + | + |
| Cys03 | tRNA-Cys-GCA-9-2 | 674.61 | 319.77 | 68.82 |  | + | + | + |
| tRNA-Cys-GCA-9-4 | 1107.73 | 893.89 | 29.34 |  | + | + | + |
|  | tRNA-Cys-GCA-11-1 | 429.12 | 40.22 | 36.42 |  | + | + | + |
| Cys06 | tRNA-Cys-GCA-14-1 | 3436.97 | 3650.05 | 4853.66 |  | +++ | ++++ | +++ |
|  | tRNA-Cys-GCA-15-1 | 596.14 | 300.58 | 3.71 |  | + | + | + |
| Cys08 | tRNA-Cys-GCA-17-1 | 2559.11 | 4052.71 | 2353.60 |  | +++ | +++++ | ++ |
|  | tRNA-Cys-GCA-20-1 | 326.50 | 142.15 | 52.27 |  | + | + | + |
|  | tRNA-Cys-GCA-24-1 | 802.39 | 319.45 | 46.55 |  | + | + | + |

**Supplementary Table 4.** The tRNA-Cys-GCA isodecoders detected by YAMAT-Seq in MCF7, SKBR3 and BT20 cell lines by (Shigematsu et al. 2017) with their numerical values. The expression values are expressed as RPM (reads per million).

|  |  | **MCF7 cell line** | | |  | **SKBR3 cell line** | | |  | **BT20 cell line** | | |
| --- | --- | --- | --- | --- | --- | --- | --- | --- | --- | --- | --- | --- |
| **tRNA** | **Gene name** | **MCF7_A** | **MCF7_B** | **MCF7_C** |  | **SKBR3_A** | **SKBR3_B** | **SKBR3_C** |  | **BT20_A** | **BT20_B** | **BT20_C** |
|  | tRNA-Cys-GCA-1-1 | 13.29 | 6.78 | 8.24 |  | 0.36 | 0.24 | 0.00 |  | 3.66 | 4.23 | 4.24 |
| Cys02 | tRNA-Cys-GCA-2-1 | 133.88 | 74.82 | 91.33 |  | 334.06 | 362.83 | 179.70 |  | 110.28 | 115.32 | 117.25 |
|  | tRNA-Cys-GCA-3-1 | 0.07 | 0.00 | 0.00 |  | 0.00 | 0.00 | 0.00 |  | 0.00 | 0.00 | 0.00 |
| Cys01 | tRNA-Cys-GCA-4-1 | 51.65 | 93.17 | 37.42 |  | 5.86 | 6.27 | 3.39 |  | 29.42 | 35.11 | 30.80 |
| Cys05 | tRNA-Cys-GCA-5-1 | 107.85 | 3.51 | 78.48 |  | 2.10 | 2.60 | 1.44 |  | 28.04 | 28.99 | 28.53 |
|  | tRNA-Cys-GCA-6-1 | 10.71 | 0.08 | 7.61 |  | 0.14 | 0.41 | 0.25 |  | 0.97 | 1.53 | 0.94 |
|  | tRNA-Cys-GCA-7-1 | 3.59 | 0.32 | 2.77 |  | 0.00 | 0.00 | 0.00 |  | 0.48 | 0.45 | 1.18 |
| Cys04 | tRNA-Cys-GCA-8-1 | 1.83 | 1.28 | 1.27 |  | 0.58 | 0.33 | 0.17 |  | 0.41 | 0.72 | 0.24 |
| Cys03 | tRNA-Cys-GCA-9-1 | 16.07 | 0.08 | 11.57 |  | 0.80 | 0.98 | 0.17 |  | 7.04 | 8.19 | 8.33 |
|  | tRNA-Cys-GCA-10-1 | 0.00 | 0.00 | 0.32 |  | 0.00 | 0.00 | 0.00 |  | 0.00 | 0.00 | 0.00 |
|  | tRNA-Cys-GCA-11-1 | 0.00 | 36.69 | 0.08 |  | 0.00 | 0.00 | 0.00 |  | 0.00 | 0.00 | 0.00 |
|  | tRNA-Cys-GCA-12-1 | 1.83 | 0.00 | 1.82 |  | 0.14 | 0.08 | 0.00 |  | 0.41 | 0.18 | 0.00 |
|  | tRNA-Cys-GCA-13-1 | 6.51 | 3.67 | 4.36 |  | 0.51 | 0.16 | 0.08 |  | 0.90 | 0.54 | 1.02 |
| Cys06 | tRNA-Cys-GCA-14-1 | 14.85 | 11.25 | 10.54 |  | 0.14 | 0.24 | 0.25 |  | 0,00 | 0.09 | 0.16 |
|  | tRNA-Cys-GCA-15-1 | 0.68 | 11.81 | 0.40 |  | 0.00 | 0.00 | 0.00 |  | 0.14 | 0.00 | 0.00 |
|  | tRNA-Cys-GCA-16-1 | 2.51 | 1.68 | 1.59 |  | 0.00 | 0.08 | 0.00 |  | 0.90 | 0.54 | 0.31 |
| Cys08 | tRNA-Cys-GCA-17-1 | 0.00 | 0.00 | 0,00 |  | 0.00 | 0.00 | 0.00 |  | 0.00 | 0.00 | 0.00 |
|  | tRNA-Cys-GCA-18-1 | 0.07 | 1.28 | 0.08 |  | 0.00 | 0.00 | 0.00 |  | 0.07 | 0.00 | 0.00 |
|  | tRNA-Cys-GCA-19-1 | 0.00 | 0.00 | 0.00 |  | 0.00 | 0.00 | 0.00 |  | 0.00 | 0.09 | 0.00 |

**Supplementary Table 5.** The tRNA-Cys-GCA isodecoders detected by YAMAT-Seq in MCF7, SKRB3 and BT20 cell lines by (Shigematsu et al. 2017) expressed with a plus sign “+”, + meaning 0-20 %; ++ meaning 20-40 %; +++ meaning 40-60 %; ++++ meaning 60-80 %; +++++ meaning 80-100 % of expression (100 % being the highest scoring value).

|  |  | **Expression analysis** | | | | | | | | | | | |
| --- | --- | --- | --- | --- | --- | --- | --- | --- | --- | --- | --- | --- | --- |
| **tRNA** | **Gene name** | **MCF7_A** | **MCF7_B** | **MCF7_C** | **Average** | **SKBR3_A** | **SKBR3 B** | **SKBR3_C** | **Average** | **BT20_A** | **BT20 B** | **BT20_C** | **Average** |
|  | tRNA-Cys-GCA-1-1 | + | + | + | + | + | + | 0 | + | + | + | + | + |
| Cys02 | tRNA-Cys-GCA-2 | +++++ | +++++ | +++++ | +++++ | +++++ | +++++ | +++++ | +++++ | +++++ | ++++ | +++++ | ++++ |
|  | tRNA-Cys-GCA-3-1 | + | 0 | 0 | ND | 0 | 0 | 0 | ND | 0 | 0 | 0 | ND |
| Cys01 | tRNA-Cys-GCA-4-1 | ++ | +++++ | +++ | +++ | + | + | + | + | ++ | ++ | ++ | ++ |
| Cys05 | tRNA-Cys-GCA-5-1 | +++++ | + | +++++ | ++++ | + | + | + | + | ++ | ++ | ++ | ++ |
|  | tRNA-Cys-GCA-6-1 | + | + | + | + | + | + | + | + | + | + | + | + |
|  | tRNA-Cys-GCA-7-1 | + | + | + | + | 0 | 0 | + | ND | 0 | + | + | + |
| Cys04 | tRNA-Cys-GCA-8-1 | + | + | + | + | + | + | + | + | + | + | + | + |
| Cys03 | tRNA-Cys-GCA-9 | + | + | + | + | + | + | + | + | + | + | + | + |
|  | tRNA-Cys-GCA-10-1 | 0 | 0 | + | ND | 0 | 0 | 0 | ND | 0 | 0 | 0 | ND |
|  | tRNA-Cys-GCA-11-1 | 0 | ++ | + | + | 0 | 0 | 0 | ND | 0 | 0 | 0 | ND |
|  | tRNA-Cys-GCA-12-1 | + | - | + | + | + | + | 0 | + | + | + | 0 | + |
|  | tRNA-Cys-GCA-13-1 | + | + | + | + | + | + | + | + | + | + | + | + |
| Cys06 | tRNA-Cys-GCA-14-1 | + | + | + | + | + | + | + | + | 0 | + | + | + |
|  | tRNA-Cys-GCA-15-1 | + | + | + | + | 0 | 0 | + | ND | 0 | 0 | 0 | ND |
|  | tRNA-Cys-GCA-16-1 | + | + | + | + | 0 | + | 0 | ND | + | + | + | + |
| Cys08 | tRNA-Cys-GCA-17-1 | 0 | 0 | 0 | ND | 0 | 0 | 0 | ND | 0 | 0 | 0 | ND |
|  | tRNA-Cys-GCA-18-1 | + | + | + | + | 0 | 0 | 0 | ND | + | 0 | 0 | ND |
|  | tRNA-Cys-GCA-19-1 | 0 | 0 | 0 | ND | 0 | 0 | 0 | ND | 0 | + | 0 | ND |

**Supplementary Table 6. All tRNA-Cys isodecoders detected by aforementioned methods** (Rudolph et al. 2016; Shigematsu et al. 2017; Torres et al. 2019) summarized with their expression levels expressed with a plus sign (+), + meaning 0-20 %; ++ meaning 20-40 %; +++ meaning 40-60 %; ++++ meaning 60-80 %; +++++ meaning 80-100 % of expression (100 % being the highest scoring value).

|  |  | **tRNA-Seq in HEK293T** | |  | **ChiP-Seq in cell lines** | | |  | **YAMAT-Seq in cell lines** | | |
| --- | --- | --- | --- | --- | --- | --- | --- | --- | --- | --- | --- |
| **tRNA** | **Gene name** | **CTRL(3.1)** | **CTRL(4.1)** |  | **HepG2** | **Huh7** | **Liver-Adult** |  | **MCF7** | **SKBR3** | **BT20** |
|  | tRNA-Cys-GCA-1-1 | ++ | +++ |  | + | + | + |  | + | + | + |
| Cys02 | tRNA-Cys-GCA-2-1 | +++++ | + |  | ND | ND | ND |  | +++++ | +++++ | ++++ |
| tRNA-Cys-GCA-2-2 | +++++ | +++++ |  | ++ | +++ | ++ |  |
| tRNA-Cys-GCA-2-3 | + | + |  | +++++ | +++++ | +++++ |  |
| tRNA-Cys-GCA-2-4 | +++ | ++ |  | ND | ND | ND |  |
|  | tRNA-Cys-GCA-3-1 | + | + |  | ND | ND | ND |  | ND | ND | ND |
| Cys01 | tRNA-Cys-GCA-4-1 | + | + |  | ++++ | +++++ | ++++ |  | +++ | + | ++ |
| Cys05 | tRNA-Cys-GCA-5-1 | ++ | + |  | + | + | + |  | ++++ | + | ++ |
|  | tRNA-Cys-GCA-6-1 | ++ | + |  | ND | ND | ND |  | + | + | + |
|  | tRNA-Cys-GCA-7-1 | + | + |  | ND | ND | ND |  | + | ND | + |
| Cys04 | tRNA-Cys-GCA-8-1 | + | + |  | + | + | + |  | + | + | + |
| Cys03 | tRNA-Cys-GCA-9-1 | + | + |  | ND | ND | ND |  | + | + | + |
| tRNA-Cys-GCA-9-2 | + | +++ |  | + | + | + |  |
| tRNA-Cys-GCA-9-3 | ++ | +++ |  | ND | ND | ND |  |
| tRNA-Cys-GCA-9-4 | + | +++ |  | + | + | + |  |
|  | tRNA-Cys-GCA-10-1 | + | + |  | ND | ND | ND |  | ND | ND | ND |
|  | tRNA-Cys-GCA-11-1 | + | + |  | + | + | + |  | + | ND | ND |
|  | tRNA-Cys-GCA-12-1 | ++ | ++++ |  | ND | ND | ND |  | + | + | + |
|  | tRNA-Cys-GCA-13-1 | + | + |  | ND | ND | ND |  | + | + | + |
| Cys06 | tRNA-Cys-GCA-14-1 | + | + |  | +++ | ++++ | +++ |  | + | + | + |
|  | tRNA-Cys-GCA-15-1 | + | + |  | + | + | + |  | + | ND | ND |
|  | tRNA-Cys-GCA-16-1 | + | + |  | ND | ND | ND |  | + | ND | + |
| Cys08 | tRNA-Cys-GCA-17-1 | +++++ | +++++ |  | +++ | +++++ | ++ |  | ND | ND | ND |
|  | tRNA-Cys-GCA-18-1 | + | + |  | ND | ND | ND |  | + | ND | ND |
|  | tRNA-Cys-GCA-19-1 | + | + |  | ND | ND | ND |  | ND | ND | ND |
|  | tRNA-Cys-GCA-20-1 | + | + |  | + | + | + |  | ND | ND | ND |
|  | tRNA-Cys-GCA-21-1 | ++ | ++ |  | ND | ND | ND |  | ND | ND | ND |
| Cys07 | tRNA-Cys-GCA-22-1 | + | + |  | ND | ND | ND |  | ND | ND | ND |
|  | tRNA-Cys-GCA-23-1 | + | + |  | ND | ND | ND |  | ND | ND | ND |
|  | tRNA-Cys-GCA-24-1 | + | + |  | + | + | + |  | ND | ND | ND |
|  | tRNA-Cys-GCA-25-1 | + | + |  | ND | ND | ND |  | ND | ND | ND |
| Cys09 | tRNA-Cys-ACA-1-1 | + | + |  | ND | ND | ND |  | ND | ND | ND |

**Supplementary Table 7.** Plasmids used in this study.

| **Plasmid** | **Description** | **Source of reference** |
| --- | --- | --- |
| PBB171 | p2luci-UGA-TMV-U6-no tRNA | (Beznoskova et al. 2021) |
| PBB172 | p2luci-CAG-TMV-U6-no tRNA | (Beznoskova et al. 2021) |
| GL3101 | pSGDluc-UGA-CUAG-no tRNA | (Loughran et al. 2017) |
| GL3102 | pSGDluc-UGG-CUAG-no tRNA | (Loughran et al. 2017) |
| PBB210 | p2luci-UGA-TMV-U6-Cys04 | This study |
| PBB200 | p2luci-CAG-TMV-U6-Cys04 | This study |
| PBB212 | p2luci-UGA-TMV-U6-Cys05 | This study |
| PBB201 | p2luci-CAG-TMV-U6-Cys05 | This study |
| PBB215 | p2luci-UGA-TMV-U6-Cys09 | This study |
| PBB202 | p2luci-CAG-TMV-U6-Cys09 | This study |
| PBB267 | p2luci-UGA-TMV-U6-Cys07 | This study |
| PBB268 | p2luci-CAG-TMV-U6-Cys07 | This study |
| pMK1 | pSGDluc-UGA-CUAG-U6-Cys02 | This study |
| pMK9 | pSGDluc-UGG-CUAG-U6-Cys02 | This study |
| pMK3 | pSGDluc-UGA-CUAG-U6-Cys06 | This study |
| pMK11 | pSGDluc-UGG-CUAG-U6-Cys06 | This study |
| pMK4 | pSGDluc-UGA-CUAG-U6-Cys08 | This study |
| pMK13 | pSGDluc-UGG-CUAG-U6-Cys08 | This study |
| pMK5 | pSGDluc-UGA-CUAG-U6-Cys03 | This study |
| pMK15 | pSGDluc-UGG-CUAG-U6-Cys03 | This study |
| pMK7 | pSGDluc-UGA-CUAG-U6-Cys01 | This study |
| pMK17 | pSGDluc-UGG-CUAG-U6-Cys01 | This study |
| pMK20 | p2luci-UGA-TMV-U6-Cys02 | This study |
| pMK19 | p2luci-CAG-TMV-U6-Cys02 | This study |
| pMK24 | p2luci-UGA-TMV-U6-Cys06 | This study |
| pMK22 | p2luci-CAG-TMV-U6-Cys06 | This study |
| pMK28 | p2luci-UGA-TMV-U6-Cys08 | This study |
| pMK26 | p2luci-CAG-TMV-U6-Cys08 | This study |
| pMK32 | p2luci-UGA-TMV-U6-Cys03 | This study |
| pMK30 | p2luci-CAG-TMV-U6-Cys03 | This study |
| pMK36 | p2luci-UGA-TMV-U6-Cys01 | This study |
| pMK34 | p2luci-CAG-TMV-U6-Cys01 | This study |

**Supplementary Table 8.** Primers used in this study.

| **Primer name** | **Primer sequence (5´to 3´)** |
| --- | --- |
| PB179 | AATAAGGGCCCGGGGGTATAGCTCAGGGGTAGAGCATTTGACTGCAGATCAAGAGGTCCCCGGTTCAAATCCGGGTGCCCCCTGGTACCAATAA |
| PB180 | TTATTGGTACCAGGGGGCACCCGGATTTGAACCGGGGACCTCTTGATCTGCAGTCAAATGCTCTACCCCTGAGCTATACCCCCGGGCCCTTATT |
| PB181 | AATAAGGGCCCGGGGGTATAGCTCAGTGGGTAGAGCATTTGACTGCAGATCAAGAGGTCCCCGGTTCAAATCCGGGTGCCCCCTGGTACCAATAA |
| PB182 | TTATTGGTACCAGGGGGCACCCGGATTTGAACCGGGGACCTCTTGATCTGCAGTCAAATGCTCTACCCACTGAGCTATACCCCCGGGCCCTTATT |
| PB183 | AATAAGGGCCCGGCTGTATAGCTCAGTGGTAGAGCATTTGACTACAGGTCATATGTAGCTGGGTTCAAATCCTGTTTCTGCCAGGTACCAATAA |
| PB184 | TTATTGGTACCTGGCAGAAACAGGATTTGAACCCAGCTACATATGACCTGTAGTCAAATGCTCTACCACTGAGCTATACAGCCGGGCCCTTATT |

**Supplementary Table 9.** Genestrings (GeneArt™ Strings™ DNA Fragments by Invitrogen) used in this study.

| **Name** | **DNA sequence (5´to 3´)** |
| --- | --- |
| SG5 | CTGATAAATGCTTCAATAATATGGCCAAAGGTCGGGCAGGAAGAGGGCCTATTTCCCATGATTCCTTCATATTTGCATATACGATACAAGGCTGTTAGAGAGATAATTGGAATTAATTTGACTGTAAACACAAAGATATTAGTACAAAATACGTGACGTAGAAAGTAATAATTTCTTGGGTAGTTTGCAGTTTTAAAATTATGTTTTAAAATGGACTATCATATGCTTACCGTAACTTGAAAGTATTTCGATTTCTTGGCTTTATATATCTTGTGGAAAGGACGAAACACCGGGGCCCGGGCGTATAGCTCAGGGGTAGAGCATTTGACTGCAGATCAAGAGGTCCCCAGTTCAAATCTGGGTGCCCACTGGTACCTATTGAAAAAGGAAGAGTATG |
| MK1 | CTGATAAATGCTTCAATAATAGTTTAAACGGATCCTGGCCAAAGGTCGGGCAGGAAGAGGGCCTATTTCCCATGATTCCTTCATATTTGCATATACGATACAAGGCTGTTAGAGAGATAATTGGAATTAATTTGACTGTAAACACAAAGATATTAGTACAAAATACGTGACGTAGAAAGTAATAATTTCTTGGGTAGTTTGCAGTTTTAAAATTATGTTTTAAAATGGACTATCATATGCTTACCGTAACTTGAAAGTATTTCGATTTCTTGGCTTTATATATCTTGTGGAAAGGACGAAACACCGGGGCCCGGGGGTATAGCTCAGTGGTAGAGCATTTGACTGCAGATCAAGAGGTCCCCGGTTCAAATCCGGGTGCCCCCTGGTACCTATTGAAAAATTTTTTGGAACCCGGGGTCGACGTTTAAACTATTGAAAAAGGAAGAGTATG |
| MK2 | CTGATAAATGCTTCAATAATAGTTTAAACGGATCCTGGCCAAAGGTCGGGCAGGAAGAGGGCCTATTTCCCATGATTCCTTCATATTTGCATATACGATACAAGGCTGTTAGAGAGATAATTGGAATTAATTTGACTGTAAACACAAAGATATTAGTACAAAATACGTGACGTAGAAAGTAATAATTTCTTGGGTAGTTTGCAGTTTTAAAATTATGTTTTAAAATGGACTATCATATGCTTACCGTAACTTGAAAGTATTTCGATTTCTTGGCTTTATATATCTTGTGGAAAGGACGAAACACCGGGGCCCGGGGGTATAGCTCAGGGGTAGAGCATTTGACTGCAGATCAAGAAGTCCCCGGTTCAAATCCGGGTGCCCCCTGGTACCTATTGAAAAATTTTTTGGAACCCGGGGTCGACGTTTAAACTATTGAAAAAGGAAGAGTATG |
| MK3 | CTGATAAATGCTTCAATAATAGTTTAAACGGATCCTGGCCAAAGGTCGGGCAGGAAGAGGGCCTATTTCCCATGATTCCTTCATATTTGCATATACGATACAAGGCTGTTAGAGAGATAATTGGAATTAATTTGACTGTAAACACAAAGATATTAGTACAAAATACGTGACGTAGAAAGTAATAATTTCTTGGGTAGTTTGCAGTTTTAAAATTATGTTTTAAAATGGACTATCATATGCTTACCGTAACTTGAAAGTATTTCGATTTCTTGGCTTTATATATCTTGTGGAAAGGACGAAACACCGGGGCCCGGGGATATAGCTCAGGGGTAGAGCATTTGACTGCAGATCAAGAGGTCCCCGGTTCAAATCCGGGTGCCCCCCGGTACCTATTGAAAAATTTTTTGGAACCCGGGGTCGACGTTTAAACTATTGAAAAAGGAAGAGTATG |
| MK4 | CTGATAAATGCTTCAATAATAGTTTAAACGGATCCTGGCCAAAGGTCGGGCAGGAAGAGGGCCTATTTCCCATGATTCCTTCATATTTGCATATACGATACAAGGCTGTTAGAGAGATAATTGGAATTAATTTGACTGTAAACACAAAGATATTAGTACAAAATACGTGACGTAGAAAGTAATAATTTCTTGGGTAGTTTGCAGTTTTAAAATTATGTTTTAAAATGGACTATCATATGCTTACCGTAACTTGAAAGTATTTCGATTTCTTGGCTTTATATATCTTGTGGAAAGGACGAAACACCGGGGCCCGGGGGTATAGCTCAGGGGTAGAGCATTTGACTGCAGATCAAGAGGTCCCTGGTTCAAATCCAGGTGCCCCCTGGTACCTATTGAAAAATTTTTTGGAACCCGGGGTCGACGTTTAAACTATTGAAAAAGGAAGAGTATG |
| MK5 | CTGATAAATGCTTCAATAATAGTTTAAACGGATCCTGGCCAAAGGTCGGGCAGGAAGAGGGCCTATTTCCCATGATTCCTTCATATTTGCATATACGATACAAGGCTGTTAGAGAGATAATTGGAATTAATTTGACTGTAAACACAAAGATATTAGTACAAAATACGTGACGTAGAAAGTAATAATTTCTTGGGTAGTTTGCAGTTTTAAAATTATGTTTTAAAATGGACTATCATATGCTTACCGTAACTTGAAAGTATTTCGATTTCTTGGCTTTATATATCTTGTGGAAAGGACGAAACACCGGGGCCCGGGGGTATAGCTCAGTGGTAGAGCATTTGACTGCAGATCAAGAGGTCCCTGGTTCAAATCCGGGTGCCCCCTGGTACCTATTGAAAAATTTTTTGGAACCCGGGGTCGACGTTTAAACTATTGAAAAAGGAAGAGTATG |

**SUPPLEMENTARY FIGURES and FIGURE LEGENDS**

**
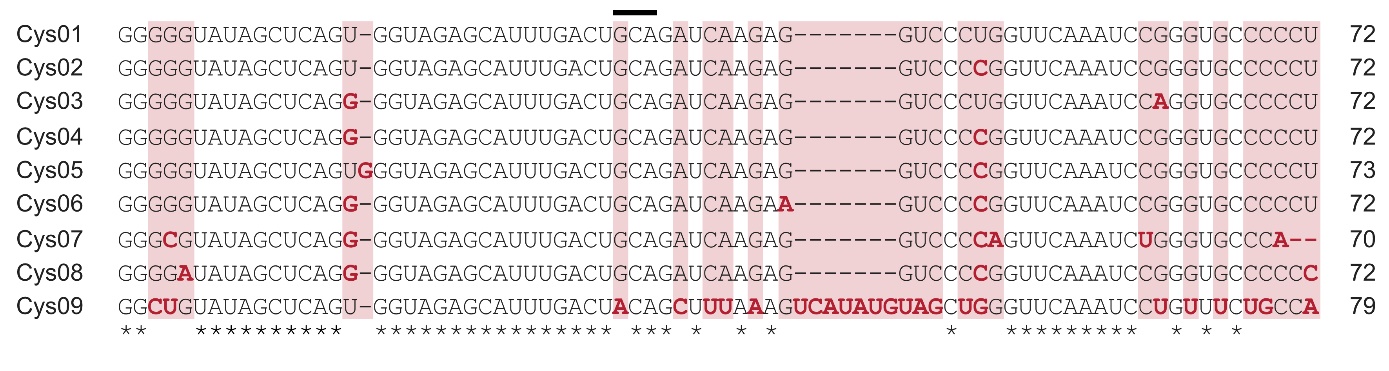
Supplementary Figure 1.** **Primary sequence alignment of the all 9 selected tRNACys isodecoders.** Individual base differences are highlighted in red; the anticodon position is indicated by a solid line.

**
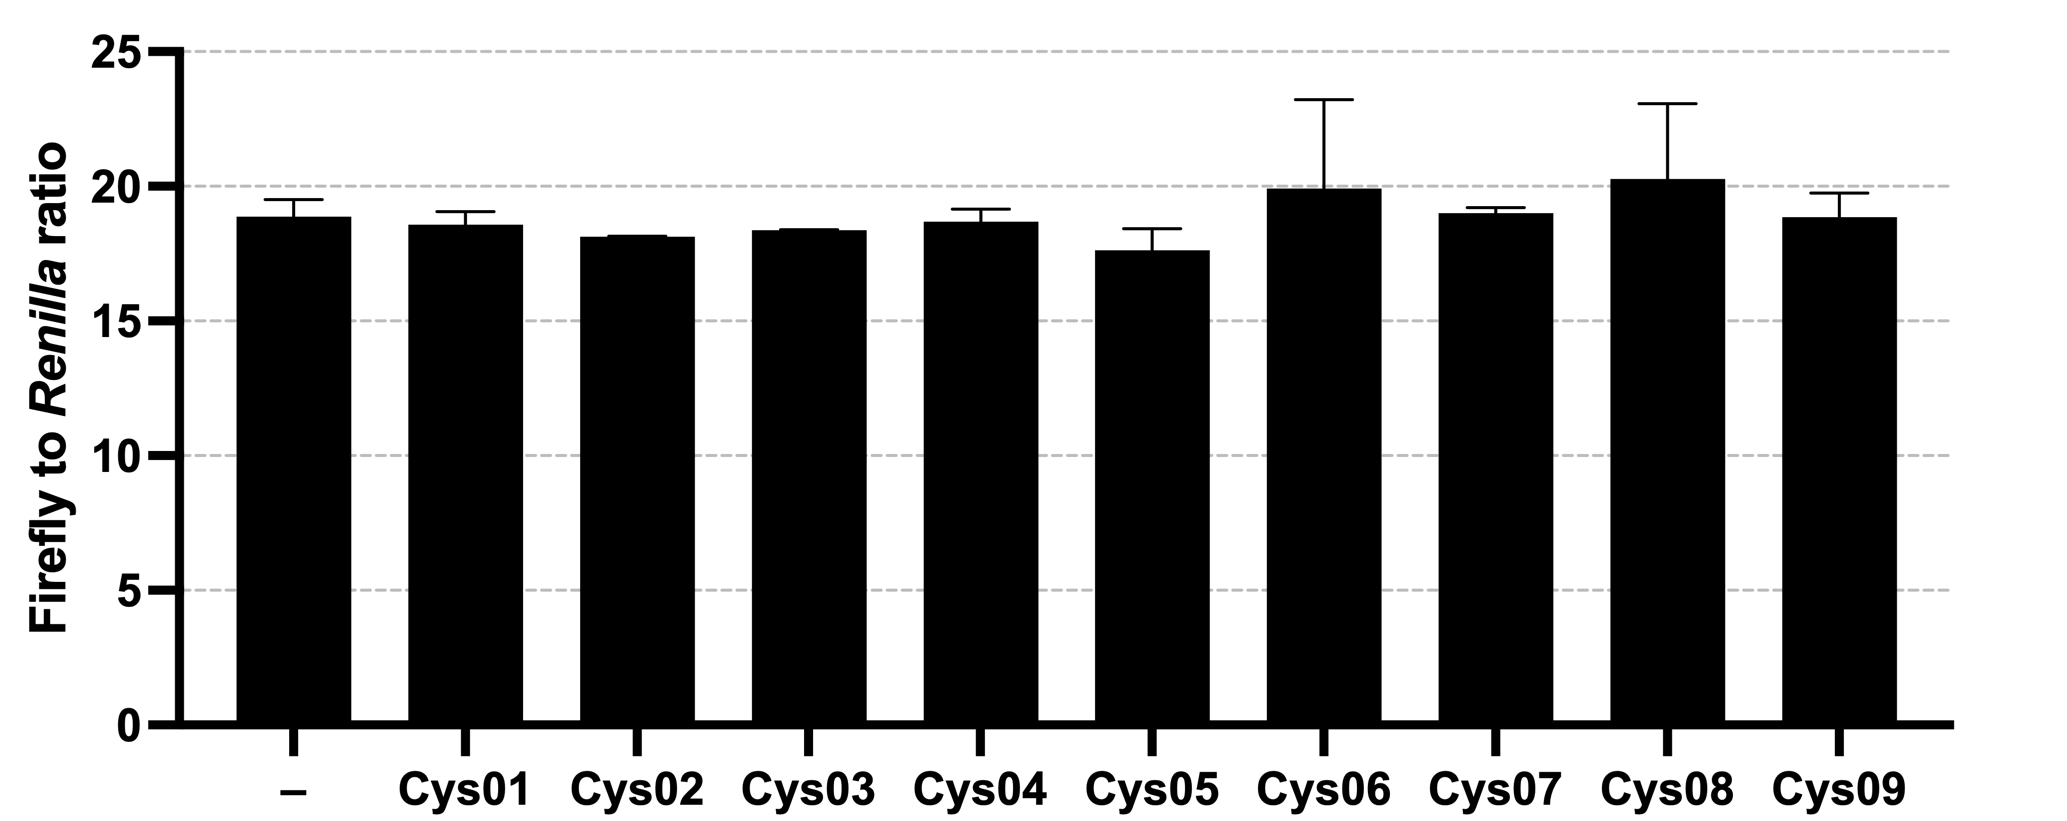
**

**Supplementary Figure 2.** **Overexpression of human tRNA-Cys isodecoders in p2luci reporter bearing CAG sense codon does not affect Firefly to *Renilla* ratio in HEK293T cells**. The F/R ratio values measured for plasmids bearing sense codon are comparable, thus, for further experiments, the exact numerical value for each sense-codon plasmid would be neglected and only the reporter with no tRNA (-) value be used for readthrough calculation.
